# Supplementary material
Source: publisher figshare collection journal article supplement (https://springernature.figshare.com/ndownloader/files/22246086)
Supplement: Supplementary file [file 22246086]

## 1. Data

Table 1 lists the datasets used in this study. The RNA-Seq and ChIP-seq data were processed as mentioned in Section 4.3. The sequencing reads were binned in 200 bp bins and the raw ChIP read counts were normalized and binarized using normR. In this study we consider only uniquely mapped reads.

| Cell line | Residue                                                                             | Sequencing | Accession number            | Source                      |
|-----------|-------------------------------------------------------------------------------------|------------|-----------------------------|-----------------------------|
| IMR90     | H3K27ac                                                                             | ChIP-seq   | ENCSR002YRE                 | ENCODE                      |
| IMR90     | H3K4me3                                                                             | ChIP-seq   | ENCSR087PFU                 | ENCODE                      |
| IMR90     | H3K4me1                                                                             | ChIP-seq   | ENCSR831JSP                 | ENCODE                      |
| IMR90     | H3K36me3                                                                            | ChIP-seq   | ENCSR437ORF                 | ENCODE                      |
| IMR90     | H3K27me3                                                                            | ChIP-seq   | ENCSR431UUY                 | ENCODE                      |
| IMR90     | H3K9me3                                                                             | ChIP-seq   | ENCSR055ZZY                 | ENCODE                      |
| IMR90     | input                                                                               | ChIP-seq   | ENCSR001BSB,<br>ENCSR704GTT | ENCODE                      |
| IMR90     | RNA Polymerase II-Input                                                             | ChIP-seq   | ENCSR000EFL                 | ENCODE                      |
| IMR90     | RNA Polymerase II                                                                   | ChIP-seq   | ENCSR000EFK                 | ENCODE                      |
| IMR90     | mRNA                                                                                | RNA-Seq    | ENCSR000CTQ                 | ENCODE                      |
| HepG2     | RNA Polymerase II-Input                                                             | ChIP-seq   | ENCSR000EEM                 | ENCODE                      |
| HepG2     | RNA Polymerase II                                                                   | ChIP-seq   | ENCSR000EEN                 | ENCODE                      |
| HepG2     | H3K27ac, H3K4me3, H3K4me1, H3K36me3, H3K27me3, H3K9me3, Histone mark input, RNA-Seq | ChIP-seq   | EGAD00001002527             | DEEP                        |
| K562      | mRNA                                                                                | RNA-Seq    | SRR315336,<br>SRR315337     | European nucleotide archive |
| K562      | Nascent RNA                                                                         | TT-Seq     | GSE75792                    | Gene Expression Omnibus     |
| K562      | Nascent RNA                                                                         | GRO-Seq    | GSM1480325                  | Gene Expression Omnibus     |
| HepG2     | Nascent RNA                                                                         | GRO-Seq    | GSM2428726                  | Gene Expression Omnibus     |
| IMR90     | Nascent RNA                                                                         | GRO-Seq    | GSM1055806                  | Gene Expression Omnibus     |

**Table S1:** Experimental data used in this study

## 2. Summary statistics

The summary statistics of transcription units predicted by EPIGENE, STRINGTIE and CUFFLINKS can be seen in Table 2,3 and 4.

|                                                    | <b>genes</b> | <b>+ strand</b> | <b>- strand</b> | <b>median length</b> |
|----------------------------------------------------|--------------|-----------------|-----------------|----------------------|
| <b>all</b>                                         | 24,571       | 13,410          | 11,161          | 7,800                |
| <b>gencode V19 + chess 2.1 same strand overlap</b> | 18,184       | 9,774           | 8,410           | 9,800                |
| <b>gencode V19 + chess 2.1 any overlap</b>         | 23,542       | 12,921          | 10,621          | 8,400                |
| <b>no match</b>                                    | 1,029        | 489             | 540             | 2,000                |

**Table S2:** Summary statistics of transcription units predicted by EPIGENE

|                                                    | <b>genes</b> | <b>+ strand</b> | <b>- strand</b> | <b>median length</b> |
|----------------------------------------------------|--------------|-----------------|-----------------|----------------------|
| <b>all</b>                                         | 101,656      | 50,636          | 51,020          | 5,481                |
| <b>gencode V19 + chess 2.1 same strand overlap</b> | 93,006       | 46,448          | 46,558          | 6,719                |
| <b>gencode V19 + chess 2.1 any overlap</b>         | 97,300       | 48,531          | 48,769          | 6,110                |
| <b>no match</b>                                    | 4,356        | 2,105           | 2,251           | 613                  |

**Table S3:** Summary statistics of transcription units predicted by STRINGTIE

|                                                    | <b>genes</b> | <b>+ strand</b> | <b>- strand</b> | <b>median length</b> |
|----------------------------------------------------|--------------|-----------------|-----------------|----------------------|
| <b>all</b>                                         | 32,079       | 15,262          | 15,095          | 8,851                |
| <b>gencode V19 + chess 2.1 same strand overlap</b> | 26,452       | 12,986          | 12,671          | 16,486               |
| <b>gencode V19 + chess 2.1 any overlap</b>         | 27,157       | 13,320          | 13,042          | 15,392               |
| <b>no match</b>                                    | 4,992        | 1,942           | 2,053           | 962                  |

**Table S4:** Summary statistics of transcription units predicted by CUFFLINKS

### 3. False positives due RNA-Seq mapping artefacts

We investigated the cause of higher AUC for EPIGENE compared to RNA-Seq based approaches and found that this due to slightly higher number of false positive resulting due to RNA-Seq mapping artefacts.

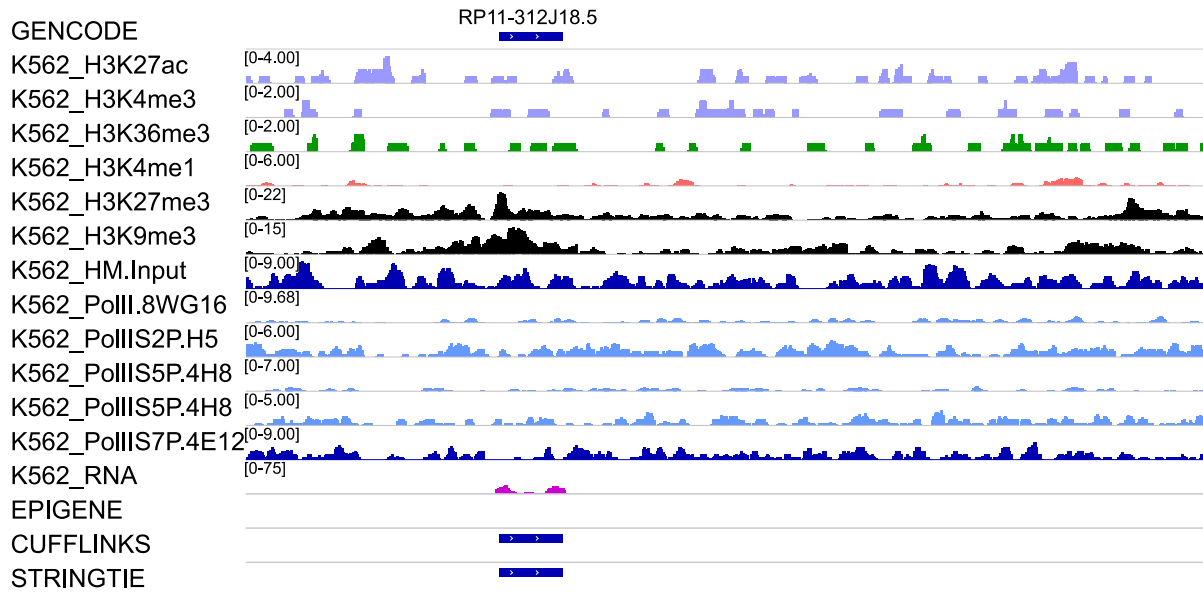

**Figure S1:** An example of CUFFLINKS and STRINGTIE due to spurious read mapping. This is a repetitive sequence occurring in chromosome 1,5,6,X. We observe an enrichment of repressive histone modifications like H3K27me3 and H3K9me3 (tracks shown in black) indicating that this is a repressive region.

#### 4. Robustness of the EPIGENE model

The robustness of EPIGENE was examined by testing K562-trained models on two other cell lines: IMR90 and HepG2. The similar performance score of independent EPIGENE models reflected its robustness.

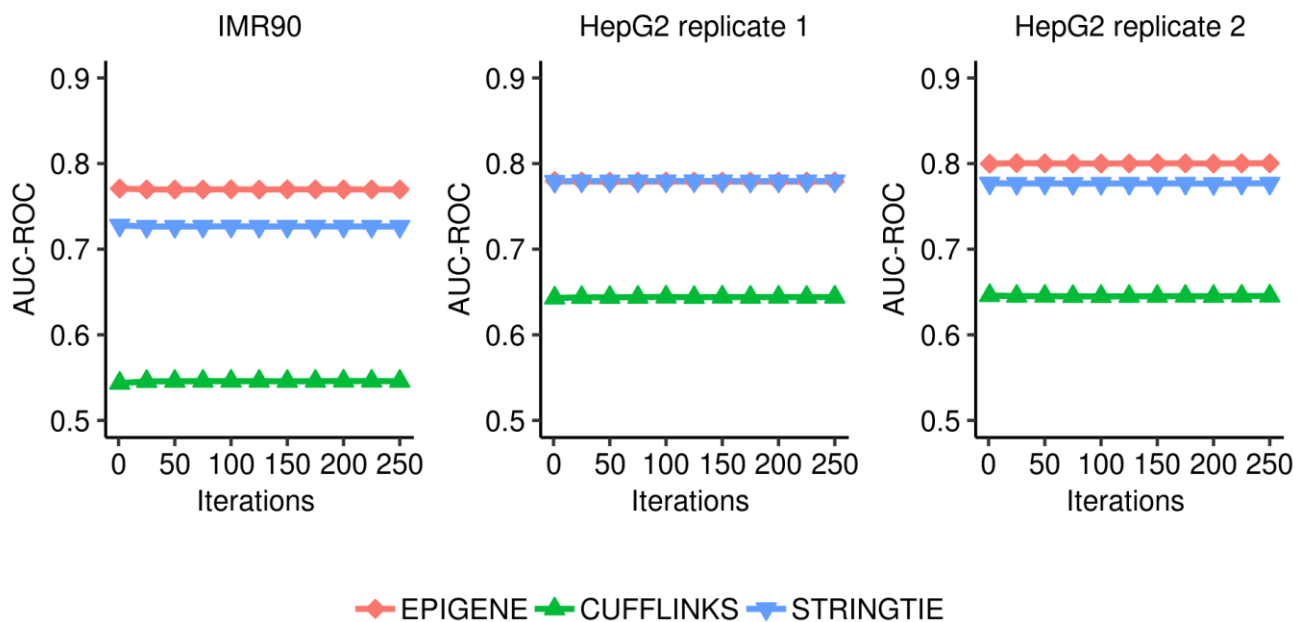

**Figure S2:** Comparison of K562 trained EPIGENE models with STRINGTIE and CUFLINKS across 2 cell lines. ROC curves show that EPIGENE achieves a superior performance for 3 data sets compared to other approaches.

## 5. Comparison with existing chromatin segmentation approaches

We compared EPIGENE with the whole-genome chromatin state annotation approach ChromHMM as it uses the same binning scheme as EPIGENE. We compared the performance of K562-trained EPIGENE and ChromHMM across 3 cell lines. A superior performance of EPIGENE demonstrates benefits of incorporating topological information to the model parameters of a probabilistic model.

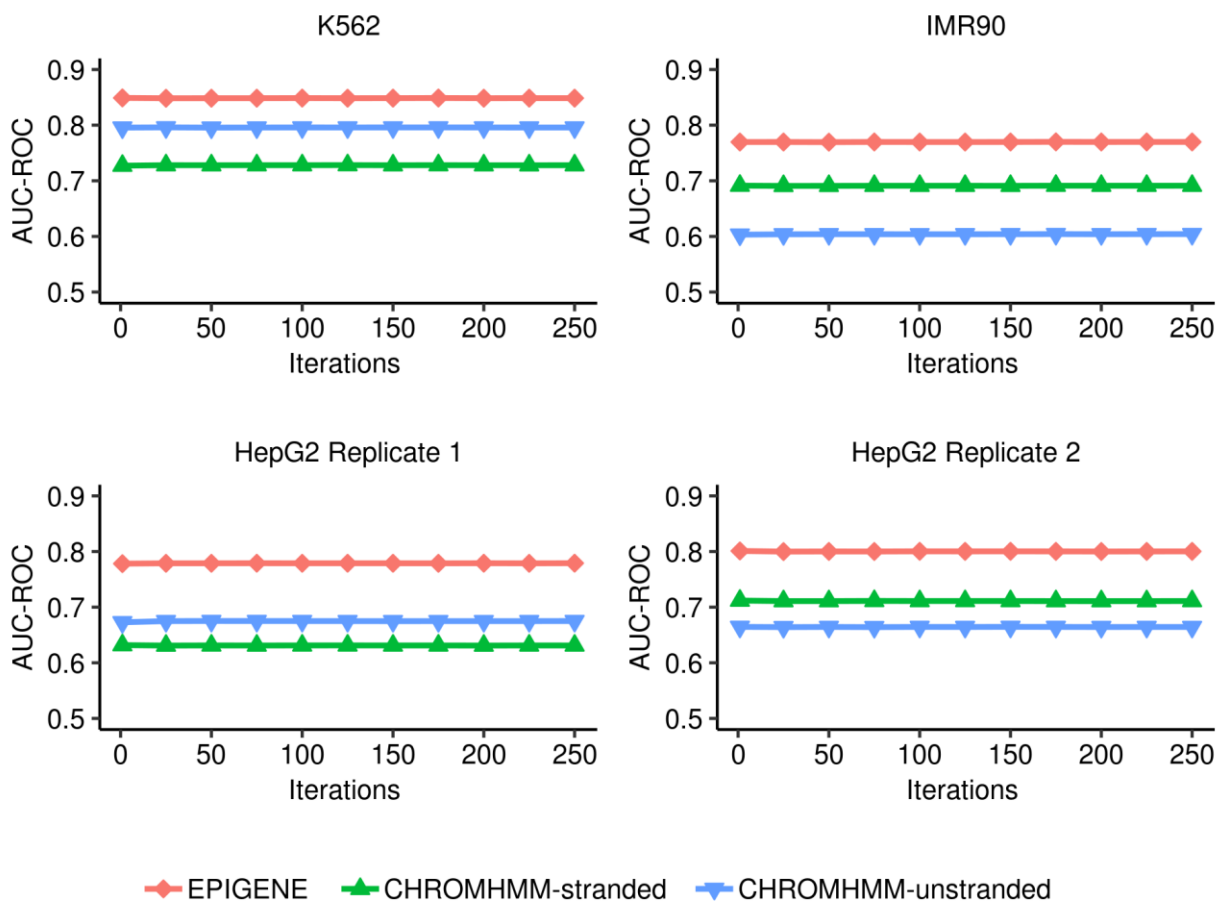

**Figure S3:** Comparison of K562 trained EPIGENE and ChromHMM models across 3 cell lines. ROC curves show that EPIGENE achieves a superior performance for 3 data sets compared to ChromHMM.

We further analysed the length of TUs predicted by EPIGENE and ChromHMM. A comparison of length distributions of EPIGENE and ChromHMM TUs revealed that ChromHMM result in

shorter TUs. Additionally, a strand specific TU identification using ChromHMM resulted in less number of TUs. This is due to the presence of intronic enhancers.

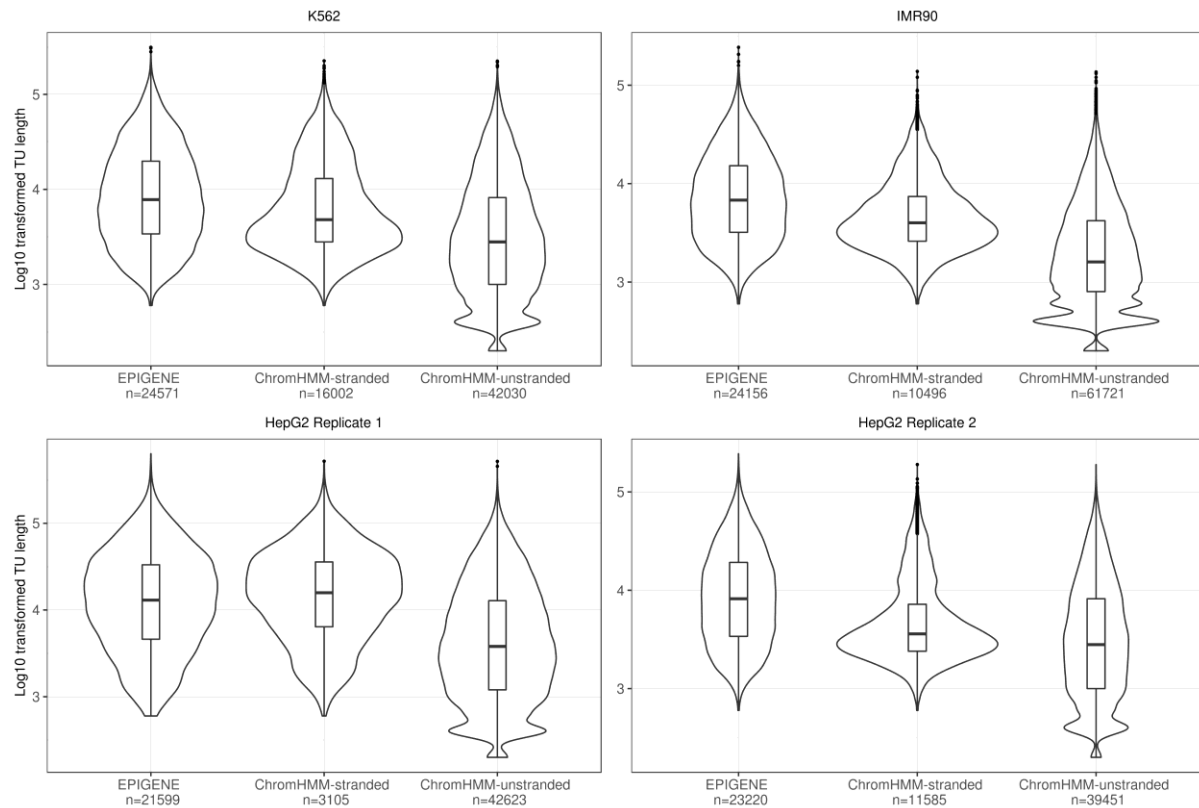

**Figure S4:** Comparison of log transformed TU length distributions of EPIGENE and ChromHMM TUs across 3 cell lines. The violin plots reveals that ChromHMM TUs are relatively shorter than EPIGENE TUs.

## 6. Distribution of EPIGENE predictions across cell lines

We create a consensus TU set using the approach to identify cell specific TUs.

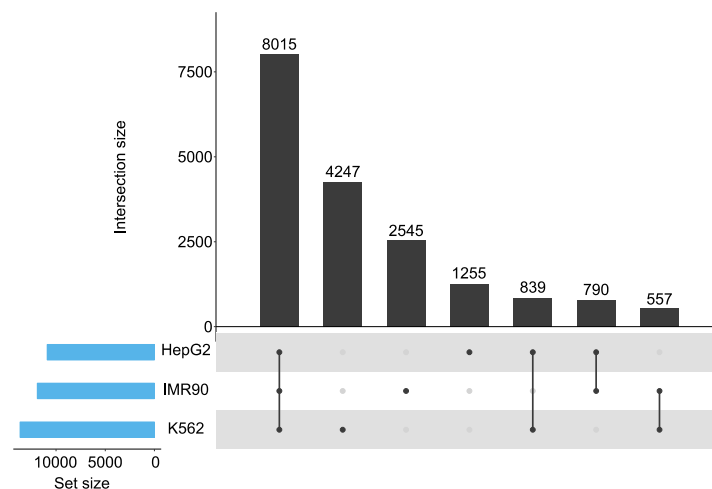

**Figure S5:** Distribution of EPIGENE TUs across cell lines

## 7. Summary statistics of EPIGENE TUs overlapping miRNAs

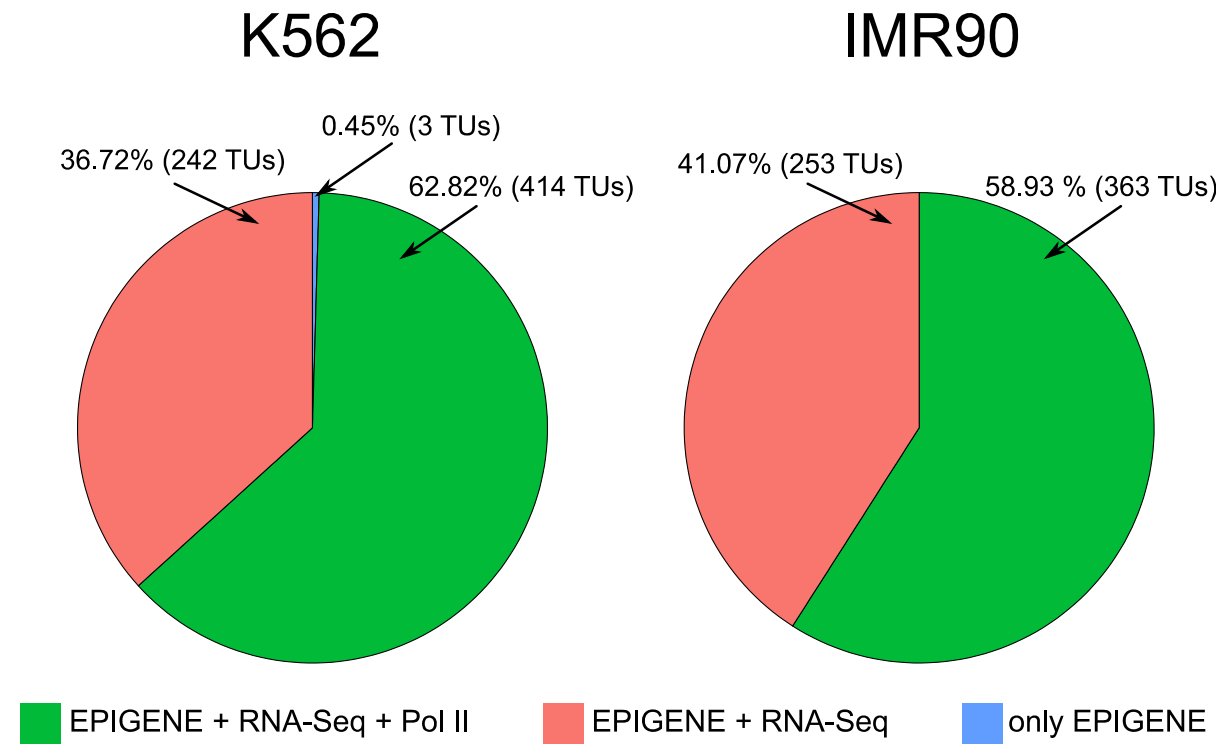

**Figure S6:** Majority of EPIGENE TUs overlapping miRNAs can be explained by RNA-Seq and Polymerase II evidence
